# Supplementary material for: Changes in Novel Anthropometric Indices of Abdominal Obesity during Weight Loss with Selected Obesity-Associated Single-Nucleotide Polymorphisms: A Small One-Year Pilot Study
Source: MDPI journal article supplement (doi:10.3390/ijerph191811837), 2022-09-19
Supplement: s1 [file s1]

# Changes in Novel Anthropometric Indices of Abdominal Obesity during Weight Loss with Selected Obesity-Associated Single-Nucleotide Polymorphisms: A Small One-Year Pilot Study

Katarzyna Iłowiecka <sup>1,\*</sup>, Paweł Glibowski <sup>2</sup>, Justyna Libera <sup>3</sup> and Wojciech Koch <sup>1,\*</sup>

<sup>1</sup> Department of Food and Nutrition, Medical University of Lublin, 4a Chodźki Str., 20-093 Lublin, Poland

<sup>2</sup> Department of Biotechnology, Microbiology and Human Nutrition, University of Life Science in Lublin, 8 Skromna Str., 20-704 Lublin, Poland

<sup>3</sup> Division of Engineering and Cereals Technology, Department of Plant Food Technology and Gastronomy, University of Life Sciences, 8 Skromna Str., 20-704 Lublin, Poland

\* Correspondence: katarzyna.ilowiecka@umlub.pl (K.I.); kochw@interia.pl (W.K.); Tel.: +48-81-448-7142 (W.K.)

**Table S1.** The percentage of subjects in which reducing (>5%) and regain of initial body weight was observed.

| SNP Variant              | Body Weight Improve in 6th Months | Body Weight Improve in 12th Months | Body Weight Regain in 12th Months |
|--------------------------|-----------------------------------|------------------------------------|-----------------------------------|
| rs9939609 (FTO)          |                                   |                                    |                                   |
| AA ( <i>n</i> = 10)      | 5 (50.0%)                         | 1 (10.0%)                          | 6 (60.0%)                         |
| AT ( <i>n</i> = 22)      | 17 (77.3%)                        | 6 (27.3%)                          | 6 (27.3%)                         |
| TT ( <i>n</i> = 4)       | 4 (100.0%)                        | 2 (50.0%)                          | 1 (25.0%)                         |
| rs987237 (TFAP2B)        |                                   |                                    |                                   |
| GG ( <i>n</i> = 4)       | 3 (75.0%)                         | 1 (25.0%)                          | 2 (50.0%)                         |
| AG ( <i>n</i> = 16)      | 12 (75.0%)                        | 6 (37.5%)                          | 4 (25.0%)                         |
| AA ( <i>n</i> = 16)      | 11 (68.8%)                        | 4 (25.0%)                          | 5 (31.3%)                         |
| rs894160 (PLIN1)         |                                   |                                    |                                   |
| AA + AG ( <i>n</i> = 17) | 15 (88.2%)                        | 7 (41.2%)                          | 5 (29.4%)                         |
| GG ( <i>n</i> = 19)      | 10 (52.6%)                        | 3 (15.8%)                          | 6 (31.6%)                         |
